# Supplementary material
Source: PubMed Central journal article supplement (PMC7856587)
Supplement: sj-pdf-1-eso-10.1177_2396987320934935.pdf [file sj-pdf-1-eso-10.1177_2396987320934935.pdf]

## SUPPLEMENTAL MATERIAL

### **Non-invasive brain stimulation as add-on therapy for subacute post-stroke aphasia: a randomized trial (NORTHSTAR)**

*Cover title: The NORTHSTAR trial*

Zumbansen, Anna, PhD<sup>(1)</sup>, Black, Sandra E., MD<sup>(2)</sup>, Chen, Joyce L., PhD<sup>(3)</sup>, Edwards, Dylan J., PhD<sup>(4,5,6)</sup>, Hartmann, Alexander, MD<sup>(7)</sup>, Heiss, Wolf-Dieter, MD<sup>(8)</sup>, Lanthier, Sylvain, MD<sup>(9)</sup>, Lesperance, Paul, MD<sup>(10)</sup>, Mochizuki, George, PhD<sup>(11)</sup>, Paquette, Caroline, PhD<sup>(12)</sup>, Rochon, Elizabeth A., PhD<sup>(13)</sup>, Rubi-Fessen, Ilona, PhD<sup>(14)</sup>, Valles, Jennie, MD<sup>(15)</sup>, Kneifel, Heike, MD<sup>(14)</sup>, Wortman-Jutt, Susan, MS<sup>(4,15)</sup> & Thiel, Alexander, MD<sup>(1)</sup>, on behalf of the NORTHSTAR-study group.

1-Jewish General Hospital, McGill University (Montreal, Quebec).

2-Department of Medicine-Neurology and Heart and Stroke Foundation Canadian Partnership for Stroke Recovery, Sunnybrook Research Institute, University of Toronto (Toronto, Ontario).

3-Faculty of Kinesiology and Physical Education, and Rehabilitation Sciences Institute, University of Toronto (Toronto, Ontario).

4-Burke Neurological Institute (White Plains, New-York).

5-Moss Rehabilitation Research Institute (Elkins Park, Pennsylvania).

6-Edith Cowan University (Joondalup, Australia).

7-Hospital of the City of Cologne and Department of Neurosurgery, University of Witten-Herdecke (Germany).

8-Max Planck Institute für Stoffwechsel Forschung - MPI for Metabolism Research, and Universität zu Köln (Cologne, Germany).

9-Hôpital du Sacré-Cœur de Montreal, Université de Montréal (Montreal, Quebec).

10-CHUM, Université de Montréal (Montreal, Quebec).

11-School of Kinesiology and Health Science, York University (Toronto, Ontario).

12-Department of Kinesiology and Physical Education, McGill University (Montreal, Quebec).

13-Toronto Rehabilitation Institute, University of Toronto (Toronto, Ontario).

14-RehaNova Neurologische Rehabilitationsklinik (Cologne, Germany).

15-Burke Rehabilitation Hospital (White Plains, New-York).

## Supplemental Methods

### Stimulation devices

TMS: Stimulation devices used were the eXimia NBS4, Nexstim Ltd. (Jewish General Hospital, Burke Rehabilitation Hospital), Magstim R<sup>2</sup>, Magstim Company Ltd. (RehaNova) and MagPro X100, MagVenture A/S (Sunnybrook Hospital and Hôpital Notre-Dame).

tDCS: Stimulation devices used were the 1x1 tDCS-Limited Total Energy, Soterix Medical Inc. (Burke Rehabilitation Hospital) and DC-Stimulator Plus from neuroConn GmbH (all other study sites).

### The Unified Aphasia Score (UnAS)

We derived a standardized T-score, the *Unified Aphasia Score (UnAS)* based on the normative data available for approved language specific batteries: The Aachen Aphasia Test in German (AAT)<sup>1</sup>, the Protocole Montréal-Toulouse-86 in French (MT86)<sup>2</sup>, and the Western Aphasia Battery in English (WAB)<sup>3</sup>. For the WAB, the UnAS was the so-called Language Quotient, which is a T score based on oral and written language subtests. We used the mean T score from an equivalent set of subtests in the AAT (subtests Token test, Repetition, Written language, Naming, and Comprehension) and the MT86 (Interview, Oral picture description, Naming, Verbal fluency, Written questionnaire, Written picture description, Auditory comprehension, Verbal commands, Written comprehension, Repetition, Copying, Writing to dictation, Reading, Repetition of numbers, Bucco-facial commands).

## Supplemental Results

### Safety – Individual results

AEs were rare. In the rTMS group, one patient reported headache (1/10 sessions) and another felt dysesthesia (1/10 sessions). In the ctDCS group, two participants reported dysesthesia for one session each. A third patient reported several adverse events (mild-moderate neck pain for 10 sessions, mild dysesthesia for 7 sessions, and headache for 1 session). In the sham group, one patient reported headache for two sessions.

We reported one SAE for one ctDCS patient. This patient discontinued the study after two treatment sessions because of chest pain starting several hours after the last stimulation session. Fifteen days later, he underwent cardiac surgery complicated by a simple focal seizure three hours post-surgery. The SAE was not thought to have been related to the study intervention.

## Supplemental Tables

**Supplemental Table 1 – Demographic & baseline data in the subgroup of patients with affected or non-affected Broca’s area**

|                                                | rTMS          | ctDCS         | Sham          | Between-group ANOVAs<br>p-value |
|------------------------------------------------|---------------|---------------|---------------|---------------------------------|
| <b>Patients with affected Broca’s area</b>     |               |               |               |                                 |
| N                                              | 8             | 11            | 9             |                                 |
| Male; Female                                   | 3;5           | 8;3           | 5;4           |                                 |
| English; French; German language               | 3;1;4         | 5;2;4         | 3;4;2         |                                 |
| Age, mean (SD)                                 | 65.5 (9.6)    | 57.9 (11.3)   | 64.8 (11.0)   | .242                            |
| Days post-stroke at recruitment, mean (SD)     | 23.4 (13.5)   | 19.2 (12.8)   | 15.2 (11.0)   | .415                            |
| Naming Z-score, mean (SD)                      | -6.11 (4.16)  | -9.18 (6.37)  | -9.82 (2.82)  | .264                            |
| Semantic fluency Z-score, mean (SD)            | -2.87 (1.04)  | -3.49 (1.02)  | -3.10 (0.43)  | .314                            |
| Oral comprehension Z-score, mean (SD)          | -8.64 (5.13)  | -11.39 (5.32) | -12.72 (4.01) | .236                            |
| Unified Aphasia Score, mean (SD)               | 52.65 (23.73) | 38.52 (23.82) | 21.60 (22.22) | .036 (rTMS > sham)              |
| <b>Patients with non-affected Broca’s area</b> |               |               |               |                                 |
| N                                              | 12            | 13            | 10            |                                 |
| Male; Female                                   | 7;5           | 6;7           | 7;3           |                                 |
| English; French; German language               | 3;5;4         | 7;1;5         | 4;1;5         |                                 |
| Age, mean (SD)                                 | 67.5 (10.2)   | 71.6 (11.5)   | 69.7 (12.3)   | .666                            |
| Days post-stroke at recruitment, mean (SD)     | 19.8 (13.5)   | 21.5 (16.6)   | 16.5 (11.9)   | .713                            |
| Naming Z-score, mean (SD)                      | -5.93 (2.95)  | -5.17 (3.03)  | -5.14 (5.56)  | .855                            |
| Semantic fluency Z-score, mean (SD)            | -2.64 (1.07)  | -2.55 (0.80)  | -2.26 (1.43)  | .703                            |
| Oral comprehension Z-score, mean (SD)          | -6.08 (5.20)  | -8.00 (3.76)  | -6.56 (4.56)  | .549                            |
| Unified Aphasia Score, mean (SD)               | 43.09 (21.67) | 50.75(20.8)   | 53.74 (21.15) | .476                            |

**Supplemental Table 2 - Real (rTMS or ctDCS) versus Sham Stimulation. Change in primary outcomes relative to baseline at post-treatment (Day 1) and at one-month follow-up (Day 30).** Medians (and interquartile ranges) are displayed for each intervention condition as well as *p*-values of median tests. Significance level = .05. BNT: Boston Naming Test, SF: Semantic Fluency, TT: Token Test.

| Z-score change                     |        | Real       | Sham       | p-value |
|------------------------------------|--------|------------|------------|---------|
| <b>Naming (BNT)</b>                | Day 1  | 1.00(1.11) | 0.73(0.94) | .118    |
|                                    | Day 30 | 1.37(1.74) | 1.02(1.71) | .934    |
| <b>Verbal fluency (SF)</b>         | Day 1  | 0.00(0.33) | 0.00(0.20) | .843    |
|                                    | Day 30 | 0.41(0.75) | 0.73(1.14) | .334    |
| <b>Sentence comprehension (TT)</b> | Day 1  | 0.94(1.87) | 1.12(1.87) | .976    |
|                                    | Day 30 | 2.10(2.40) | 2.07(2.57) | .493    |

**Supplemental Table 3 – Correlations of outcome variables with baseline scores and days post-stroke at recruitment.**

| Change relative to<br>baseline                         |        | Spearman's correlation                                | Spearman's correlation coefficient                         |
|--------------------------------------------------------|--------|-------------------------------------------------------|------------------------------------------------------------|
|                                                        |        | coefficient with baseline score<br>and <i>p-value</i> | with post-stroke days at recruitment<br>and <i>p-value</i> |
| <b>Naming (BNT)</b>                                    | Day 1  | 0.212<br>.095                                         | 0.078<br>.541                                              |
|                                                        | Day 30 | 0.064<br>.619                                         | -0.019<br>.880                                             |
| <b>Verbal fluency (SF)</b>                             | Day 1  | -0.118<br>.358                                        | -0.140<br>.274                                             |
|                                                        | Day 30 | 0.254*<br>.045                                        | -0.134<br>.296                                             |
| <b>Comprehension (TT)</b>                              | Day 1  | -0.048<br>.709                                        | -0.214<br>.092                                             |
|                                                        | Day 30 | -0.186<br>.145                                        | -.315*<br>.012                                             |
| <b>Unified Aphasia Score<br/>(UnAS) percent change</b> | Day 1  | -0.450**<br><.001                                     | -0.524**<br><.001                                          |
|                                                        | Day 30 | -0.552**<br><.001                                     | -0.511**<br><.001                                          |

## Supplemental Figures

### Supplemental Figure 1 - Change in Naming at 30-days follow-up relative to baseline (Boston Naming Test Z-score).

Patients with intact Broca's area: rTMS, N=12, Mdn=+1.95, IQR=0.33; ctDCS, N=13, Mdn=+1.33, IQR=1.42; Sham, N=10, Mdn=+0.86, IQR=1.95;  $p=.01$ . Pairwise post-hoc median tests were not significant.

Patients with lesions in Broca's area: rTMS, N=8, Mdn=+1.37, IQR=1.66; ctDCS, N=11, Mdn=+0.23, IQR=0.88; Sham, N=9, Mdn=+1.57, IQR=2.27;  $p=.489$ .

Patients with intact Broca's area

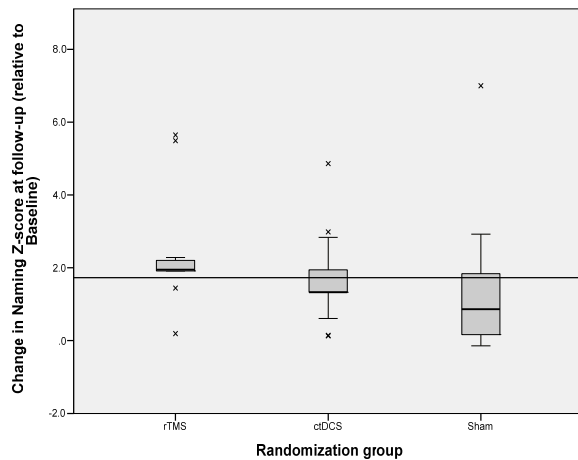

Patients with lesions in Broca's area

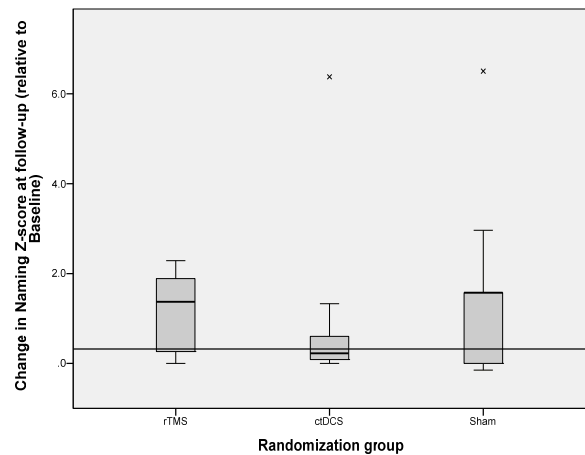

### Supplemental Figure 2 - Change in Comprehension at 30-days follow-up relative to baseline (Token Test Z-score).

Patients with intact Broca's area: rTMS, N=12, Mdn=+1.54, IQR=1.85; ctDCS, N=13, Mdn=+2.58, IQR=2.92; Sham, N=10, Mdn=+1.39, IQR=2.98;  $p=.177$ .

Patients with lesions in Broca's area rTMS, N=8, Mdn=+1.71, IQR=2.69; ctDCS, N=11, Mdn=+2.58, IQR=3.51; Sham, N=9, Mdn=+2.07, IQR=2.80;  $p=.152$ .

Patients with intact Broca's area

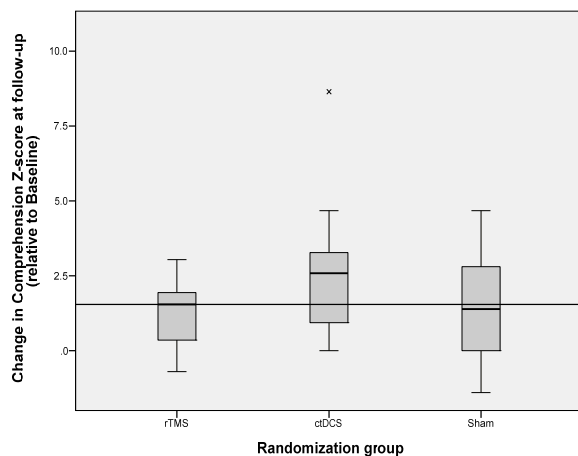

Patients with lesions in Broca's area

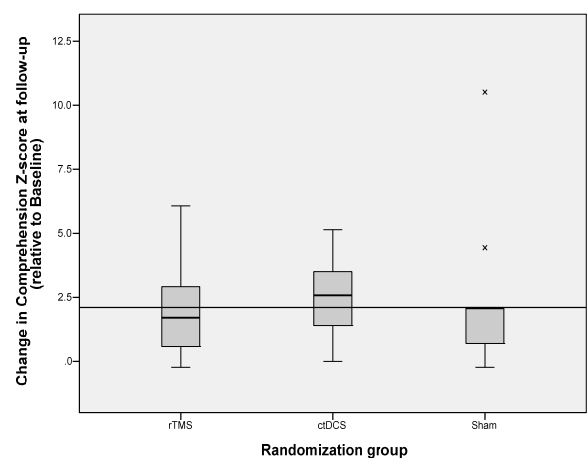

## Supplemental References

1. Huber W, Poeck K, Weniger D, Willmes K. *Der aachner aphasia test (aat)*. Göttingen, Germany: Hogrefe; 1983.
2. Nespoulous J, Lecours A, Lafond D, Lemay A, Puel M, Joannette Y. Protocole montréal-toulouse d'examen linguistique de l'aphasie [montreal-toulouse protocol of aphasia linguistic examination](mt86). *Isbergues, France: L'Ortho-Edition*. 1992
3. Kertesz A. Western aphasia battery–revised (wab-r) pro-ed. *Austin, TX*. 2006
